# Supplementary material
Source: PubMed Central journal article supplement (PMC2842212)

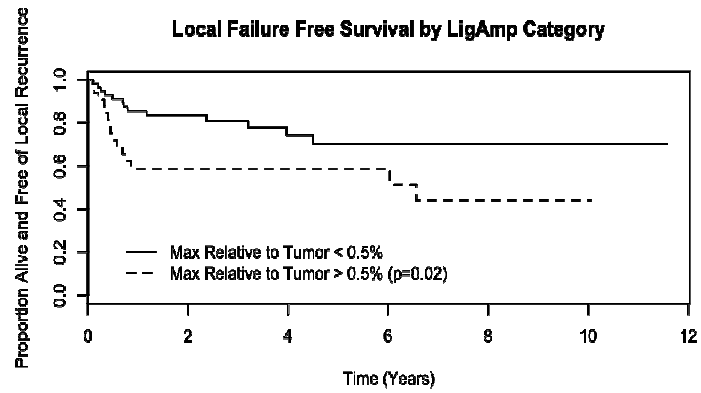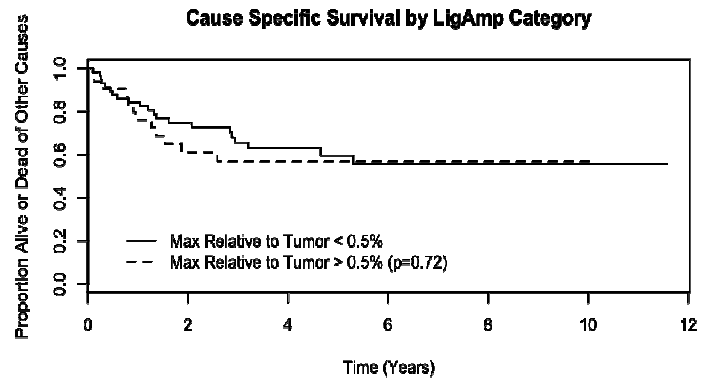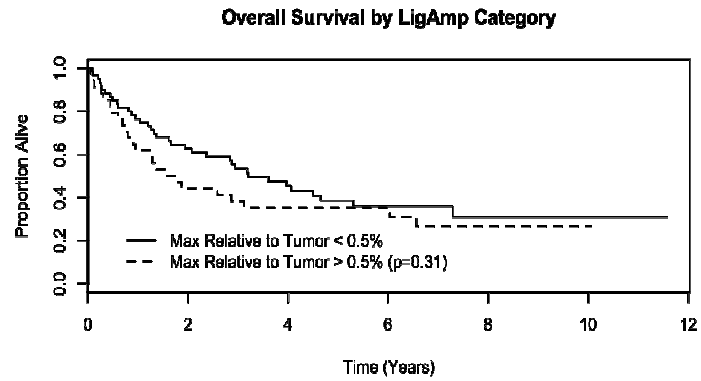

**Competing Risk of Failure by Plasmid % Category**

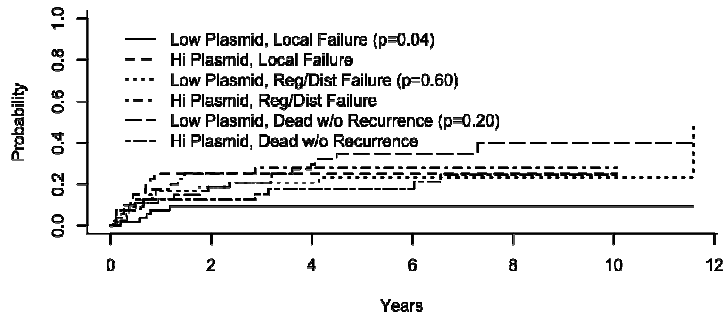

**Competing Risk of Failure by Tumor % Category**

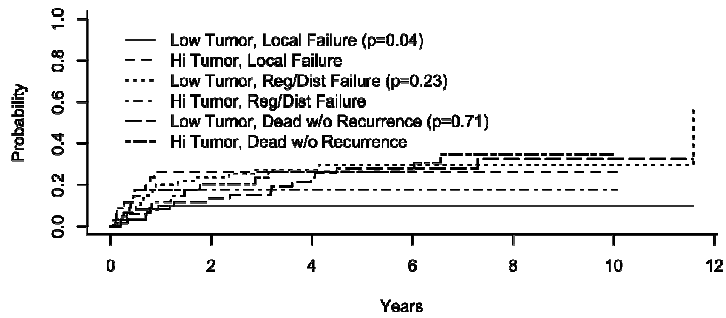

**Competing Risk of Failure by Microscopy Category**

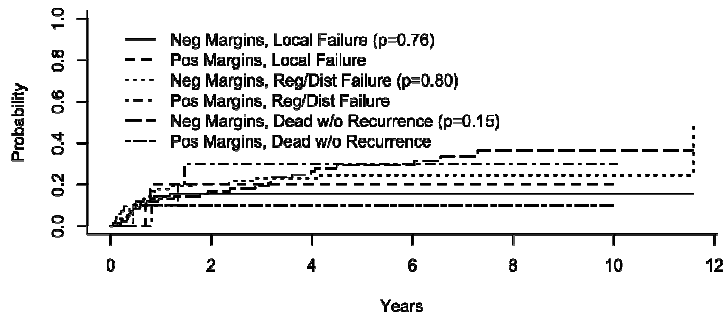

Supplement: NIHMS150775-supplement-01.pdf [file NIHMS150775-supplement-01.pdf]
