# Supplementary material
Source: PubMed Central journal article supplement (PMC2842212)

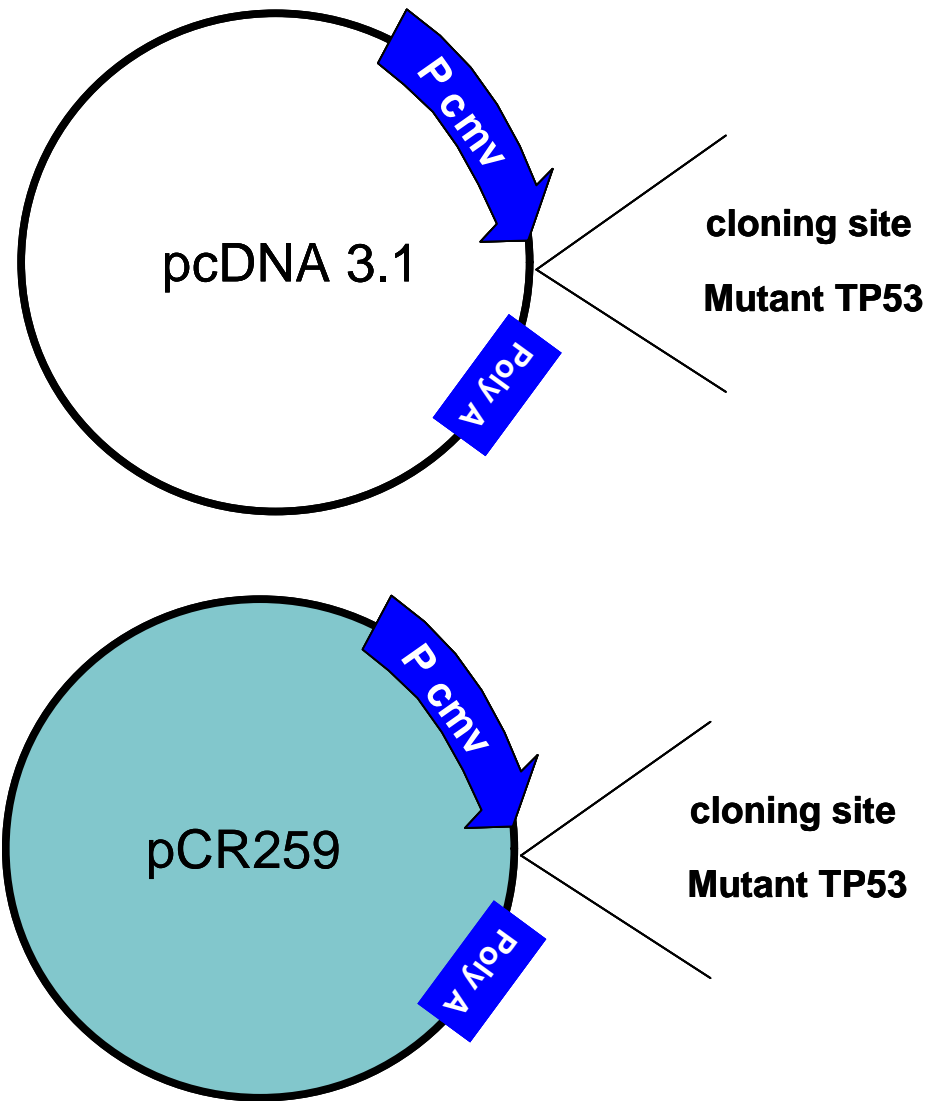

| Codon   | Number of cases |
|---------|-----------------|
| 175.2 A | 9               |
| 220.2G  | 9               |
| 248.2A  | 9               |
| 273.1 T | 8               |
| 273.2A  | 8               |
| 196.1T  | 6               |
| 213.1 T | 5               |
| 205.2G  | 4               |
| 272.1A  | 4               |
| 282.1T  | 4               |
| 245.1 A | 3               |
| 280.2A  | 3               |
| 298.1 T | 3               |
| 192.1 T | 2               |
| 193.2 T | 2               |
| 193.2G  | 2               |
| 248.1T  | 2               |
| 272.1 T | 2               |
| 273.2T  | 2               |
| 342.1T  | 2               |
| 157.1 T | 1               |
| 179.1 G | 1               |
| 206.2 A | 1               |
| 232.1T  | 1               |
| 238.2 A | 1               |
| 278.1 T | 1               |

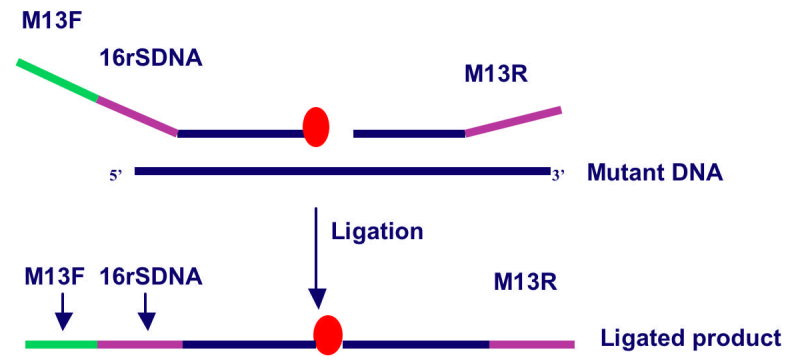

**Ligation step**

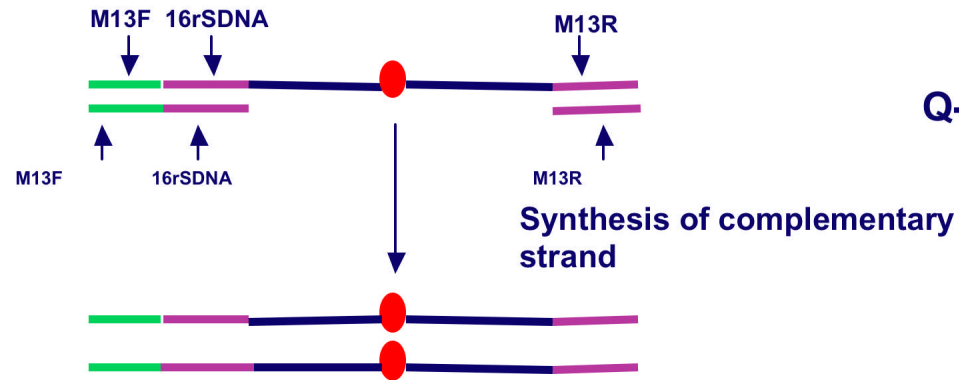

**Q-PCR**

Supplement: NIHMS150775-supplement-02.pdf [file NIHMS150775-supplement-02.pdf]
